# Supplementary material for: Leveraging a collaborative consortium model of mentee/mentor training to foster career progression of underrepresented postdoctoral researchers and promote institutional diversity and inclusion
Source: PLOS journal article supplement (doi:10.1371/journal.pone.0238518), 2020-09-01

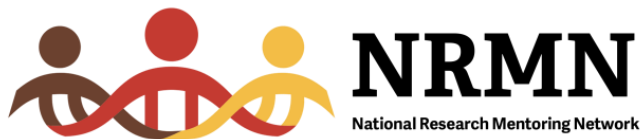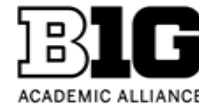

## **NRMN-CAN Postdoctoral Mentor Training Agenda**

**Sunday, March 17, 2019**  
**Aloft Hotel**  
**Conference Area past Main Lobby**

|                 |                                       |
|-----------------|---------------------------------------|
| 5:00pm – 6:00pm | Registration and Networking Reception |
| 6:00pm – 6:30pm | Welcome and Introductions             |
| 6:30pm – 7:45pm | Promoting Self-Efficacy               |
| 7:45pm – 8:45pm | Work-Life Integration                 |

**Monday, March 18, 2019**  
**Big Ten Conference Center, Second Floor, Room 202**

|                   |                                                               |
|-------------------|---------------------------------------------------------------|
| 7:30am – 8:30am   | Breakfast and Networking                                      |
| 8:30am – 10:00am  | Maintaining Effective Communication                           |
| 10:00am – 10:15am | Break                                                         |
| 10:15am – 11:15am | Addressing Equity and Inclusion                               |
| 11:15am – 12:00pm | Lunch                                                         |
| 12:00pm – 1:45pm  | Aligning Expectations and Cultivating Ethical Behavior        |
| 1:45pm – 2:00pm   | Break                                                         |
| 2:00pm – 3:30pm   | Fostering Independence and Promoting Professional Development |
| 3:30pm – 4:00pm   | Articulating Mentoring Philosophy and Next Steps              |

**NRMN-CAN Postdoctoral Mentor Training Workshop Agenda**  
**Big Ten Conference Center, Rosemont, IL**  
**June 19-21, 2016**

***Sunday, June 19, 2016 - Arrival and Networking at Aloft Chicago O'Hare Hotel***

| <u>Time</u> | <u>Activity</u>              | <u>Location</u>               |
|-------------|------------------------------|-------------------------------|
| 7:00-8:00pm | Evening Networking Reception | Aloft Hotel Lobby and XYZ Bar |

***Monday, June 20, 2016 - Big Ten Conference Center***

|               |                                                                                                                                                                          |                 |
|---------------|--------------------------------------------------------------------------------------------------------------------------------------------------------------------------|-----------------|
| 7:30-8:30am   | Breakfast, Registration and Networking                                                                                                                                   | 2nd Floor Lobby |
| 8:30-9:00am   | Welcome and Introductions                                                                                                                                                | Room 205        |
| 9:00-10:30am  | Maintaining Effective Communication                                                                                                                                      | Room 205        |
| 10:30-10:45am | <i>BREAK</i>                                                                                                                                                             |                 |
| 10:45-12:00pm | Addressing Equity and Inclusion                                                                                                                                          | Room 205        |
| 12:00-1:45pm  | <i>Keynote Address</i><br>"Mentoring and Leading From Within: Who Knows YOU Best?"<br>Dr. Jabbar Bennett, Northwestern University<br><br><i>Lunch available in lobby</i> | Room 205        |
| 1:45-2:45pm   | Aligning Expectations                                                                                                                                                    | Room 205        |
| 2:45-3:45pm   | Promoting Research Self-Efficacy                                                                                                                                         | Room 205        |
| 3:45-4:00pm   | <i>BREAK</i>                                                                                                                                                             |                 |
| 4:00-4:45pm   | Fostering Independence                                                                                                                                                   | Room 205        |
| 4:45-5:30pm   | Cultivating Ethical Behavior                                                                                                                                             | Room 205        |
| 5:30-6:30pm   | Networking Reception                                                                                                                                                     | Dining Area     |

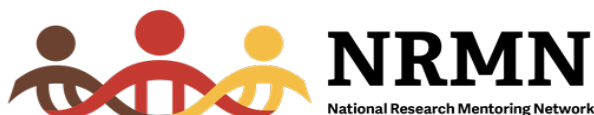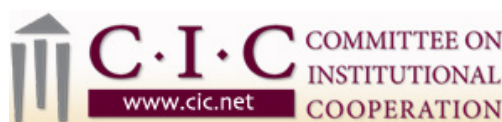

**NRMN-CAN Postdoctoral Mentor Training Workshop Agenda**  
**Big Ten Conference Center, Rosemont, IL**  
**June 19-21, 2016**

***Tuesday, June 21, 2016 - Big Ten Conference Center***

| <u>Time</u>   | <u>Activity</u>                                       | <u>Location</u> |
|---------------|-------------------------------------------------------|-----------------|
| 7:30am        | Breakfast                                             | 2nd Floor Lobby |
| 8:00-9:00am   | Promoting Professional Development                    | Room 205        |
| 9:00-9:10am   | <i>BREAK</i>                                          |                 |
| 9:10-11:00am  | Enhancing Work-Life Integration                       | Room 205        |
| 11:00-11:05am | <i>BREAK</i>                                          |                 |
| 11:05-12:00pm | Articulating your mentoring philosophy and next steps | Room 205        |
| 12:00pm       | <i>Boxed lunches to go</i>                            |                 |

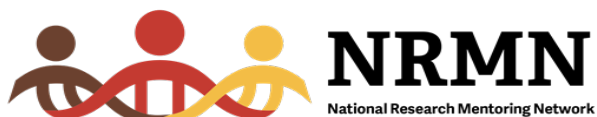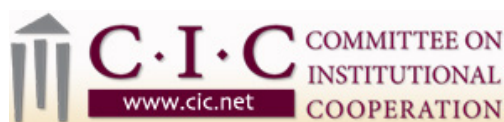

Supplement: S1 (10.1371/journal.pone.0238518.s001) [file journal.pone.0238518.s001]
